# Supplementary material for: A novel series of giant cobalt-calixarene macrocycles: ring-expansion and modulation of pore apertures through recrystallization
Source: Royal Society of Chemistry journal article supplement (doi:10.1039/d1dt00556a), 2021-01-01
Supplement: d1dt00556a1.pdf [file d1dt00556a1.pdf]

## **A novel series of giant cobalt-calixarene macrocycles: Ring-expansion and modulation of pore apertures through recrystallization**

Kai Zhang,<sup>a,c</sup> and Shao-Wu Du<sup>\*,b</sup>

<sup>a</sup> *State Key Laboratory of Structural Chemistry, Fujian Institute of Research on the Structure of Matter, Chinese Academy of Sciences, Fuzhou, Fujian 350002, China.*

<sup>b</sup> *Fujian Key Laboratory of Functional Marine Sensing Materials, Minjiang University, Fuzhou, Fujian 350108, China. E-mail: [swdu@fjirsm.ac.cn](mailto:swdu@fjirsm.ac.cn)*

<sup>c</sup> *University of Chinese Academy of Sciences, Beijing, 100049, P. R. China.*

### **Materials and Characterization**

H<sub>4</sub>TC4A was synthesized according to the literature method.<sup>1</sup> Other chemicals were purchased and without further purification before use. FT-IR spectra were recorded on a PerkinElmer Spectrum One spectrometer using KBr as pellets. Elemental analyses (C, H, and N) were carried out with a vario EL cube elemental analyzer. UV-Vis absorption spectra were detected by a Perkin-Elmer Lambda950 UV/Vis/NIR spectrophotometer. TG analysis was performed on a NETZSCH STA 449C instrument. X-ray photoelectron spectroscopic (XPS) measurements were carried out with an ESCALAB 250Xi using a monochromatic Al K $\alpha$  X-ray source. Gas sorption measurements were carried out on Micromeritics ASAP 2020 gas adsorption analyzer.

### **Absorption of dyes**

Before absorption tests, the samples were activated by soaking with MeOH for one day and drying in vacuum. In a typical adsorption experiment, 10 mg activated sample was dispersed in a 10 mL solution of dye (10 ppm). After 30 min of stirring, the solution was sampled by filtration and was analyzed by the UV-Vis spectrophotometer.

### **Synthesis of the metallomacrocycles**

#### **Synthesis of {Co<sub>30</sub>-A}**

A mixture of H<sub>4</sub>TC4A (0.1 mmol, 72 mg), H<sub>3</sub>pdc (0.15 mmol, 26 mg), Co(ClO<sub>4</sub>)<sub>2</sub>·6H<sub>2</sub>O

(0.42 mmol, 154 mg), MeOH (9 mL), DMF (1 mL) and several drops of TEA was sealed in a 23 mL Teflon-lined autoclave without stirring (Fig. S9, left) and then kept at 130°C for 3 days. After cooling it to room temperature for one day, crimson block crystals of {**Co<sub>30</sub>-A**} were collected by filtration and washed with MeOH/DMF (v:v = 9:1). The average yield for 6 attempts was about 68.7 mg, 66.8% based on H<sub>3</sub>pdC. Elemental analysis (%) for C<sub>325</sub>H<sub>374</sub>Co<sub>30</sub>N<sub>30</sub>O<sub>92</sub>S<sub>24</sub> (including 6 (CH<sub>3</sub>)<sub>2</sub>NH<sub>2</sub><sup>+</sup> cations): calculated C 44.77, H 4.30, N 4.82; found (after soaking with MeOH and drying in vacuum) C 44.85, H 4.41, N 4.86.

#### **Synthesis of {Co<sub>30</sub>-B}**

The synthetic procedure was similar to that for the synthesis of {**Co<sub>30</sub>-A**}, except that the mixture was stirred for 10 min before heating (Fig. S9, right). The average yield for 6 attempts was about 40.3 mg, 39.3% based on H<sub>3</sub>pdC. Elemental analysis (%) for C<sub>318</sub>H<sub>366</sub>Co<sub>30</sub>N<sub>30</sub>O<sub>90</sub>S<sub>24</sub> (including 6 (CH<sub>3</sub>)<sub>2</sub>NH<sub>2</sub><sup>+</sup> cations): calculated C 44.58, H 4.28, N 4.91; found (after soaking with MeOH and drying in vacuum) C 44.62, H 4.38, N 5.04.

#### **Synthesis of {Co<sub>32</sub>-A}**

The synthetic procedure was similar to that for the synthesis of {**Co<sub>30</sub>-A**}, except that CoCl<sub>2</sub>·6H<sub>2</sub>O (100 mg) was used instead of Co(ClO<sub>4</sub>)<sub>2</sub>·6H<sub>2</sub>O and DMF was replaced by NMP. Purple rod-like crystals of {**Co<sub>32</sub>-A**} were collected by filtration and washed with MeOH/NMP (v:v = 9:2). The average yield for 6 attempts was about 75.8 mg, 64.4% based on H<sub>4</sub>TC4A. Elemental analysis (%) for C<sub>360</sub>H<sub>392</sub>Cl<sub>8</sub>Co<sub>32</sub>N<sub>16</sub>O<sub>80</sub>S<sub>32</sub>: calculated C 45.87, H 4.06, N 2.38; found (after soaking with MeOH and drying in vacuum) C 45.92, H 4.24, N 2.51.

#### **Synthesis of {Co<sub>32</sub>-B}**

**Route 1:** 30 mg {**Co<sub>32</sub>-A**} was dissolved in 1 mL DMF. After evaporating in air for several days. Crystals of {**Co<sub>32</sub>-B**} were collected by filtration and washed with CH<sub>3</sub>CN. The average yield for 3 attempts: ~20.4 mg, 68.0% based on {**Co<sub>32</sub>-A**}.

**Route 2:** NaCl (10 mg) was added into 1 mL DMF solution of {**Co<sub>30</sub>-A**} (30 mg) and the mixture was heated at 130°C. Crystals of {**Co<sub>32</sub>-B**} were produced after one day. The average yield for 3 attempts: ~10.1 mg, 37.9% based on {**Co<sub>30</sub>-A**}. Elemental

analysis (%) for  $C_{360}H_{392}Cl_8Co_{32}N_{16}O_{80}S_{32}$ : calculated C 45.87, H 4.06, N 2.38; found (after soaking with MeOH and drying in vacuum) C 45.96, H 4.22, N 2.44.

#### **Synthesis of {Co<sub>32</sub>-C}.**

1 mL DMF solution containing 30 mg {Co<sub>32</sub>-A} was sealed in a 5 mL screw glass bottle and heated at 130°C. After several days, enumerable crystals of {Co<sub>32</sub>-C} were collected and washed with CH<sub>3</sub>CN. The average yield for 3 attempts: ~2.0 mg, 6.7% based on {Co<sub>30</sub>-A}.

#### **Synthesis of {Co<sub>40</sub>}.**

{Co<sub>32</sub>-A} (30 mg) in 5 mL DMF was sealed in a 5 mL screw glass bottle and stored at RT for about 2 months, a small amount of {Co<sub>40</sub>} crystals were produced. Yield: 5.2 mg, 3.4% based on {Co<sub>32</sub>-A}. Heat the DMF solution of {Co<sub>32</sub>-A} at 60 °C for two weeks increased the yield of {Co<sub>40</sub>} (the average yield for 3 attempts: ~8.0 mg, 5.1% based on {Co<sub>30</sub>-A}).

**Caution!** There is a risk of explosion when perchlorates are heated directly. Ensure the leakproofness of the hydrothermal reactor to avoid the evaporation of the solvents. Stainless steel linings are also needed in the solvothermal reactions.

#### **Single Crystal X-ray Diffraction**

Single crystal X-ray diffraction data of {Co<sub>32</sub>-A} was collected on a XtaLAB Synergy R diffractometer with Cu K $\alpha$  radiation ( $\lambda = 1.54184 \text{ \AA}$ ) at 100 K while those of {Co<sub>30</sub>-A/B}, {Co<sub>32</sub>-B/C} and {Co<sub>40</sub>} were collected on a Rigaku ROD, Synergy Custom system, HyPix diffractometer equipped with mirror-monochromatic Ga K $\alpha$  radiation ( $\lambda = 1.3405 \text{ \AA}$ ) at 120 K. The data collection and reduction were performed on the *CrysAlis<sup>Pro</sup>* program.<sup>2</sup> The structures were solved by SHELXT methods with the Olex2 program<sup>3,4</sup>, and non-hydrogen atoms were refined anisotropically by least-squares on  $F^2$  using SHELXL.<sup>3</sup> Although the diffractions were carried out at low temperature, solvents within the lattice interstices were difficult to fix based on the current data. Hence, the data were treated by the “SQUEEZE” method as implemented in PLATON.<sup>5</sup> Appropriate restraints or constraints were applied to the geometry and the atomic displacement parameters of the atoms in the compounds. The hydrogen atoms attached to C and N atoms were placed in idealized positions and refined using a riding model

to the atom to which they were attached. The  $R$  factors in the final structural refinement are relatively large but are typical for such systems.<sup>6,7</sup> Pertinent crystallographic data collection and refinement parameters are collected in Table S7. Selected bond lengths are collected in Table S8-S13.

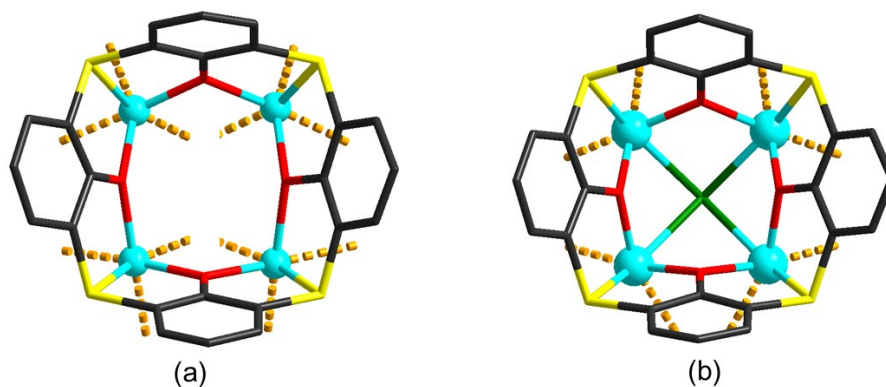

**Fig. S1** Illustration of two common SBUs for the metal-TC4A coordination cages and metallomacrocycles.  $M_4$ -TC4A (a) and  $M_4Cl$ -TC4A (b). H atoms and t-butyl groups are omitted for clarity.

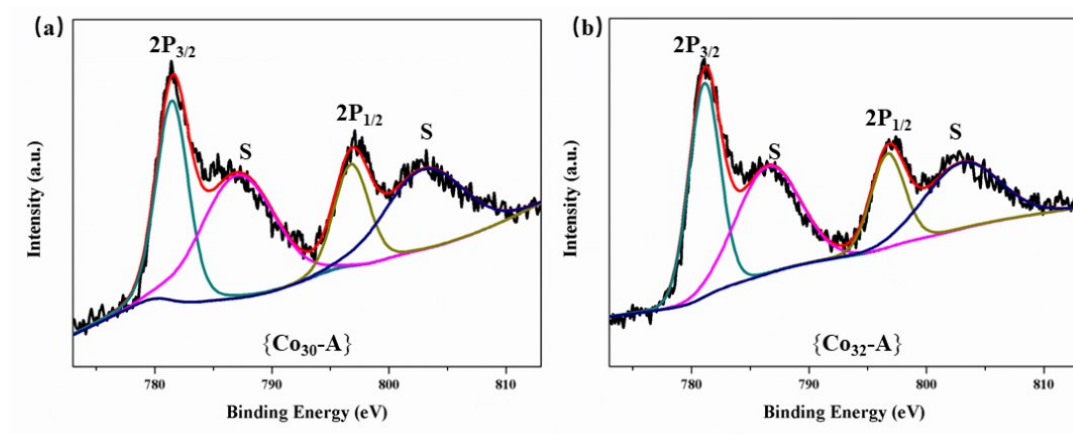

**Fig. S2** Co 2p XPS spectra of  $\{Co_{30-A}\}$  and  $\{Co_{32-A}\}$ .

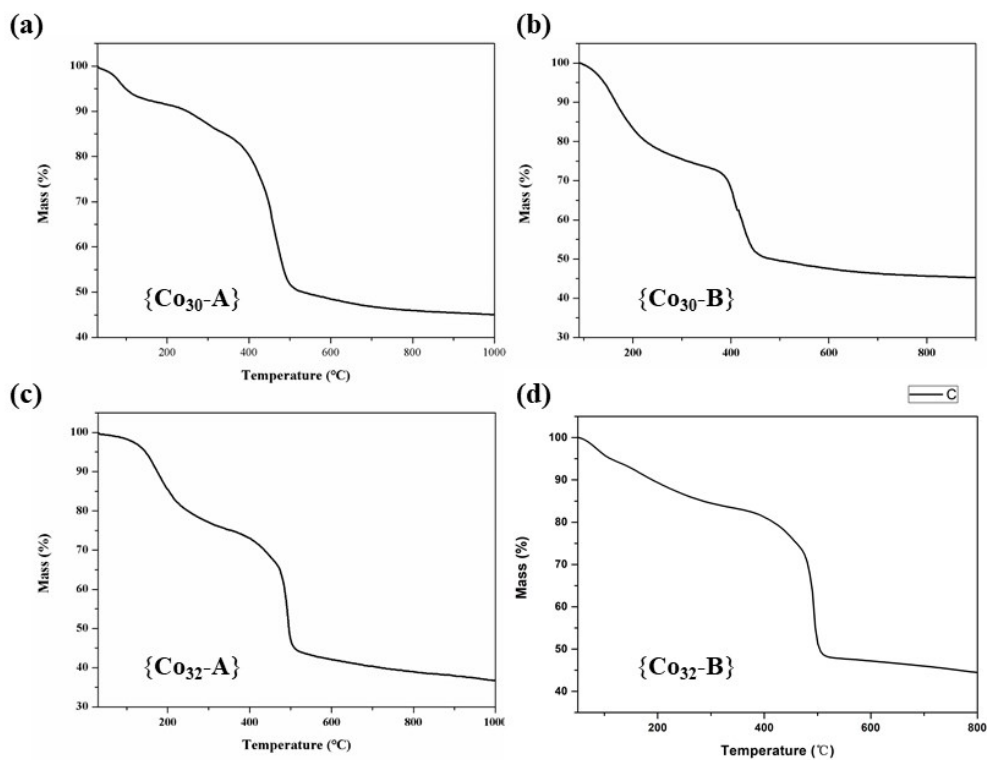

**Fig. S3** TGA curves of the metallomacrocycles.

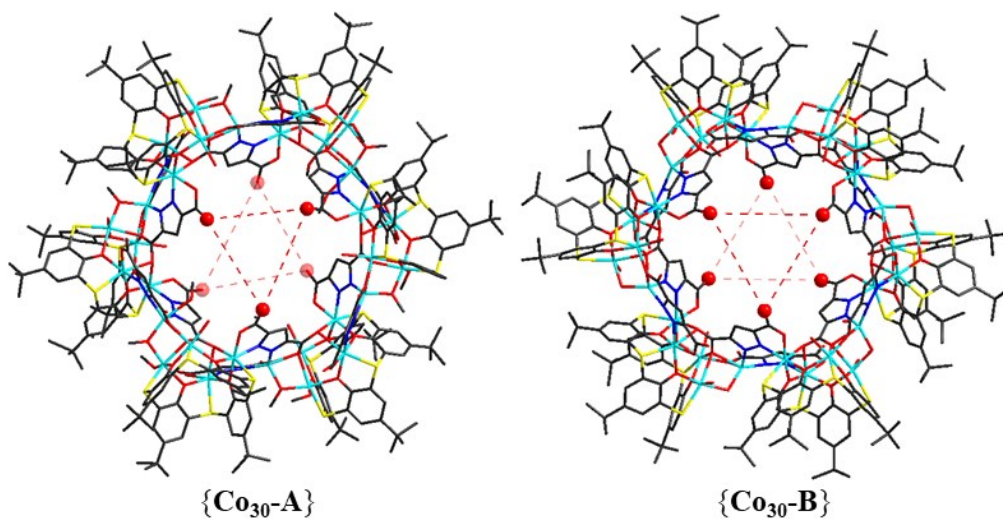

**Fig. S4** Structures of  $\{Co_{30}\text{-A/B}\}$  showing the uncoordinated carboxylate O atoms of  $pdC^{3-}$  inside the ring cavities. H atoms are omitted for clarity. Color code: C, black; O, red; N, blue; S, yellow; Co, turquoise.

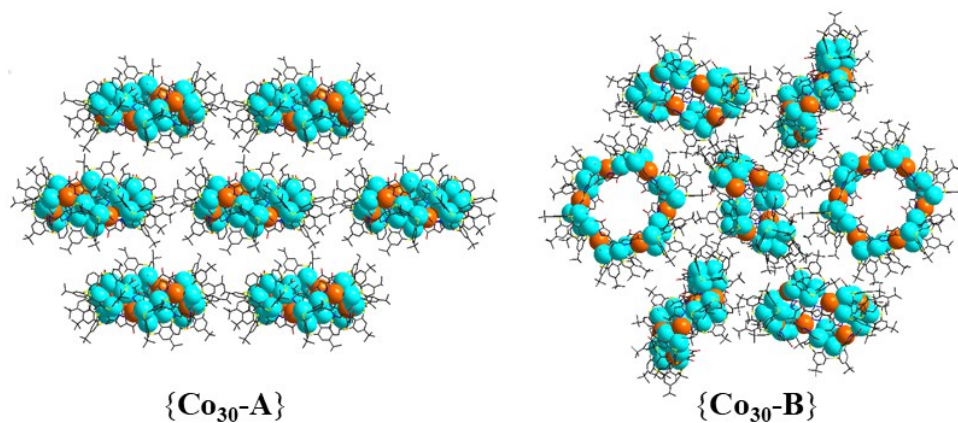

**Fig. S5** packing modes of  $\{\text{Co}_{30}\text{-A/B}\}$ .

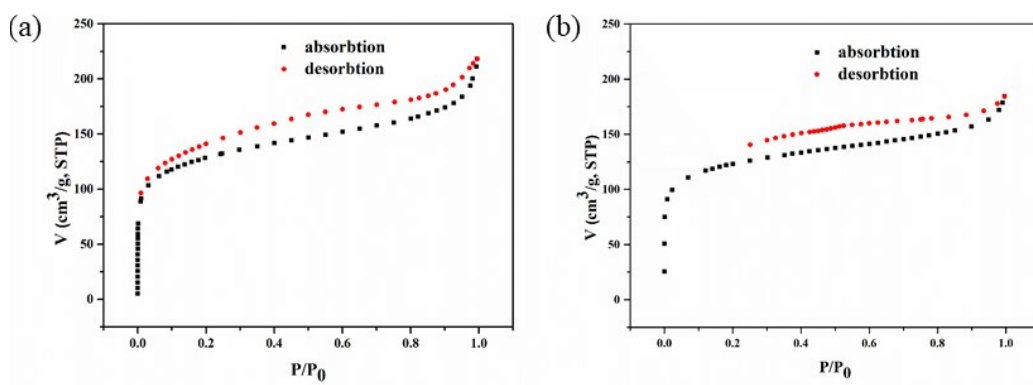

**Fig. 6**  $\text{N}_2$  adsorption isotherms (77 K) of  $\{\text{Co}_{32}\text{-A}\}$  (a) and  $\{\text{Co}_{32}\text{-B}\}$  (b).

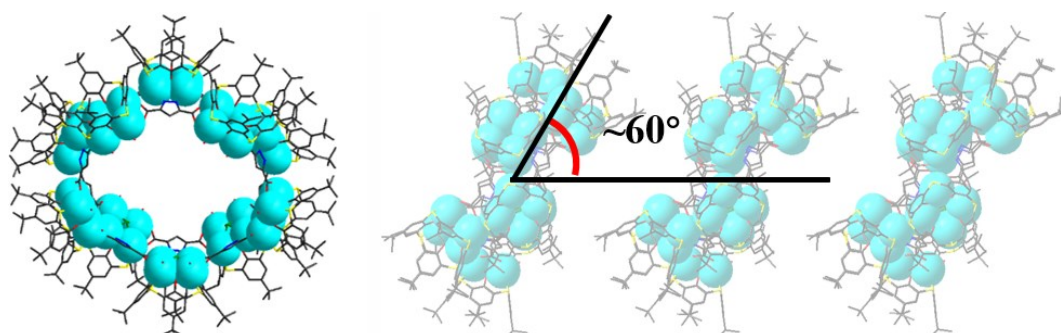

**Fig. 7** Top and side view of the tubular structures in  $\{\text{Co}_{40}\}$ .

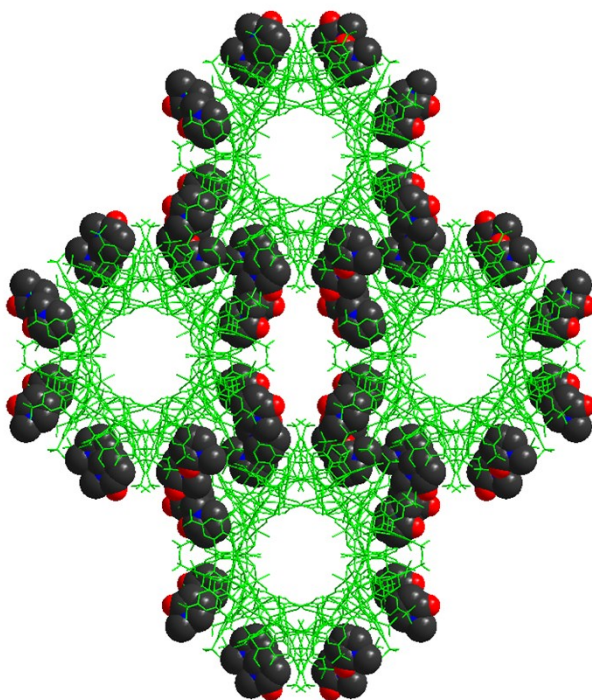

**Fig. S8** Stacking of  $\{\text{Co}_{32}\text{-A}\}$  rings showing trapped NMP molecules in the cavities.

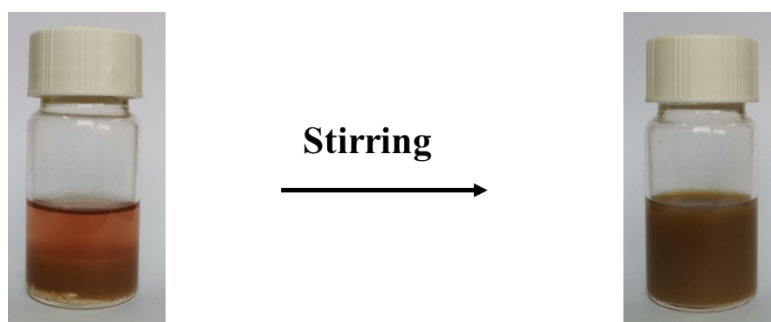

**Fig. S9** Photos of the mixture before and after stirring in synthesizing  $\{\text{Co}_{30}\text{-B}\}$ .

**Table S1** Bond valence sum values for Co atoms in  $\{\text{Co}_{30}\text{-A}\}$ .

|      |      |      |      |      |      |
|------|------|------|------|------|------|
| Co1  | 2.01 | Co11 | 1.80 | Co21 | 2.00 |
| Co2  | 1.87 | Co12 | 1.86 | Co22 | 1.81 |
| Co3  | 1.78 | Co13 | 1.90 | Co23 | 2.09 |
| Co4  | 1.99 | Co14 | 1.95 | Co24 | 2.12 |
| Co5  | 2.03 | Co15 | 1.94 | Co25 | 2.02 |
| Co6  | 2.13 | Co16 | 1.90 | Co26 | 2.06 |
| Co7  | 1.95 | Co17 | 1.95 | Co27 | 2.04 |
| Co8  | 2.07 | Co18 | 1.80 | Co28 | 1.81 |
| Co9  | 2.00 | Co19 | 1.99 | Co29 | 1.89 |
| Co10 | 1.98 | Co20 | 1.87 | Co30 | 1.89 |

**Table S2** Bond valence sum values for Co atoms in  $\{\text{Co}_{30}\text{-B}\}$ .

|     |      |     |      |     |      |
|-----|------|-----|------|-----|------|
| Co1 | 1.89 | Co3 | 2.07 | Co5 | 2.17 |
|-----|------|-----|------|-----|------|

|     |      |     |      |  |
|-----|------|-----|------|--|
| Co2 | 1.95 | Co4 | 1.97 |  |
|-----|------|-----|------|--|

**Table S3** Bond valence sum values for Co atoms in {Co<sub>32</sub>-A}.

|     |      |      |      |      |      |
|-----|------|------|------|------|------|
| Co1 | 1.92 | Co7  | 1.86 | Co13 | 2.04 |
| Co2 | 1.88 | Co8  | 1.90 | Co14 | 2.00 |
| Co3 | 1.88 | Co9  | 2.05 | Co15 | 2.01 |
| Co4 | 1.88 | Co10 | 1.89 | Co16 | 2.01 |
| Co5 | 1.89 | Co11 | 2.00 |      |      |
| Co6 | 2.04 | Co12 | 2.05 |      |      |

**Table S4** Bond valence sum values for Co atoms in {Co<sub>32</sub>-B}.

|      |      |      |      |      |      |
|------|------|------|------|------|------|
| Co1  | 1.95 | Co23 | 1.93 | Co45 | 1.93 |
| Co2  | 1.94 | Co24 | 1.87 | Co46 | 2.12 |
| Co3  | 1.95 | Co25 | 2.07 | Co47 | 2.01 |
| Co4  | 2.01 | Co26 | 1.83 | Co48 | 2.07 |
| Co5  | 1.85 | Co27 | 1.90 | Co49 | 1.94 |
| Co6  | 1.93 | Co28 | 1.97 | Co50 | 2.05 |
| Co7  | 2.17 | Co29 | 1.94 | Co51 | 1.98 |
| Co8  | 1.93 | Co30 | 2.01 | Co52 | 2.04 |
| Co9  | 1.90 | Co31 | 1.97 | Co53 | 1.97 |
| Co10 | 1.86 | Co32 | 2.04 | Co54 | 1.87 |
| Co11 | 1.90 | Co33 | 1.89 | Co55 | 1.96 |
| Co12 | 1.92 | Co34 | 1.96 | Co56 | 1.89 |
| Co13 | 1.90 | Co35 | 2.09 | Co57 | 1.85 |
| Co14 | 1.98 | Co36 | 2.06 | Co58 | 1.83 |
| Co15 | 1.95 | Co37 | 2.06 | Co59 | 2.07 |
| Co16 | 1.99 | Co38 | 2.01 | Co60 | 1.95 |
| Co17 | 1.87 | Co39 | 2.89 | Co61 | 2.01 |
| Co18 | 2.00 | Co40 | 1.93 | Co62 | 1.98 |
| Co19 | 1.95 | Co41 | 2.13 | Co63 | 2.01 |
| Co20 | 1.95 | Co42 | 1.90 | Co64 | 2.04 |
| Co21 | 2.13 | Co43 | 1.92 |      |      |
| Co22 | 1.86 | Co44 | 2.09 |      |      |

**Table S5** Bond valence sum values for Co atoms in {Co<sub>32</sub>-C}.

|     |      |      |      |      |      |
|-----|------|------|------|------|------|
| Co1 | 1.88 | Co7  | 1.90 | Co13 | 1.98 |
| Co2 | 1.85 | Co8  | 2.01 | Co14 | 2.05 |
| Co3 | 1.88 | Co9  | 1.85 | Co15 | 1.87 |
| Co4 | 1.87 | Co10 | 1.88 | Co16 | 1.96 |
| Co5 | 1.85 | Co11 | 1.89 |      |      |
| Co6 | 1.99 | Co12 | 1.94 |      |      |



**Table S6** Bond valence sum values for Co atoms in {Co<sub>40</sub>}.

|     |      |      |      |      |      |
|-----|------|------|------|------|------|
| Co1 | 1.85 | Co8  | 1.88 | Co15 | 2.03 |
| Co2 | 1.87 | Co9  | 1.88 | Co16 | 1.93 |
| Co3 | 1.83 | Co10 | 2.00 | Co17 | 1.99 |
| Co4 | 2.02 | Co11 | 2.04 | Co18 | 1.94 |
| Co5 | 1.86 | Co12 | 2.00 | Co19 | 1.98 |
| Co6 | 1.91 | Co13 | 1.92 | Co20 | 2.05 |
| Co7 | 1.89 | Co14 | 1.88 |      |      |

**PLATON SQUEEZE Results**

The SQUEEZE results from the platon program as follows:

loop\_

```
_platon_squeeze_void_nr
_platon_squeeze_void_average_x
_platon_squeeze_void_average_y
_platon_squeeze_void_average_z
_platon_squeeze_void_volume
_platon_squeeze_void_count_electrons
_platon_squeeze_void_content
```

{Co<sub>30</sub>-A}

```
1 -0.016 0.766 0.010 30861 11865 ''
```

{Co<sub>30</sub>-B}

```
1 -0.003 -0.007 -0.002 19870 5225 ''
2 0.500 0.000 0.000 900 157 ''
3 1.000 0.000 0.500 900 157 ''
4 0.500 0.500 0.500 900 157 ''
5 1.000 0.500 1.000 900 157 ''
```

{Co<sub>32</sub>-A}

```
1 -0.001 -0.006 -0.002 39420 8584 ''
2 0.214 0.203 0.653 19 0 ''
3 0.786 0.203 0.847 19 0 ''
4 0.333 0.232 0.797 10 -1 ''
5 0.667 0.232 0.703 10 -1 ''
6 0.271 0.238 0.843 13 -1 ''
7 0.729 0.238 0.657 13 -1 ''
8 0.229 0.262 0.157 13 -1 ''
9 0.771 0.262 0.343 13 -1 ''
10 0.167 0.268 0.203 10 -1 ''
11 0.833 0.268 0.297 10 -1 ''
12 0.286 0.297 0.347 19 0 ''
13 0.714 0.297 0.153 19 0 ''
14 0.286 0.703 0.847 19 0 ''
15 0.714 0.703 0.653 19 0 ''
```

|    |       |       |       |    |      |
|----|-------|-------|-------|----|------|
| 16 | 0.167 | 0.732 | 0.703 | 10 | -1'' |
| 17 | 0.833 | 0.732 | 0.797 | 10 | -1'' |
| 18 | 0.229 | 0.738 | 0.657 | 13 | -1'' |
| 19 | 0.771 | 0.738 | 0.843 | 13 | -1'' |
| 20 | 0.271 | 0.762 | 0.343 | 13 | -1'' |
| 21 | 0.729 | 0.762 | 0.157 | 13 | -1'' |
| 22 | 0.333 | 0.768 | 0.297 | 10 | -1'' |
| 23 | 0.667 | 0.768 | 0.203 | 10 | -1'' |
| 24 | 0.214 | 0.797 | 0.153 | 19 | 0''  |
| 25 | 0.786 | 0.797 | 0.347 | 19 | 0''  |

**{Co<sub>32</sub>-B}**

|   |       |       |       |       |        |
|---|-------|-------|-------|-------|--------|
| 1 | 0.023 | 0.376 | 0.020 | 64221 | 5948'' |
| 2 | 0.269 | 0.639 | 0.303 | 8     | 0''    |
| 3 | 0.769 | 0.361 | 0.303 | 7     | 0''    |
| 4 | 0.190 | 0.135 | 0.345 | 10    | 1''    |
| 5 | 0.690 | 0.865 | 0.345 | 10    | 1''    |
| 6 | 0.231 | 0.639 | 0.803 | 8     | -1''   |
| 7 | 0.731 | 0.361 | 0.803 | 7     | -1''   |
| 8 | 0.310 | 0.135 | 0.845 | 10    | 1''    |
| 9 | 0.810 | 0.865 | 0.845 | 10    | 1''    |

**{Co<sub>32</sub>-C}**

|    |        |       |        |       |        |
|----|--------|-------|--------|-------|--------|
| 1  | -0.111 | 0.637 | 0.075  | 27486 | 8098'' |
| 2  | 0.107  | 0.088 | 0.470  | 15    | -1''   |
| 3  | 0.107  | 0.912 | 0.970  | 15    | -1''   |
| 4  | 0.131  | 0.851 | 0.002  | 9     | 0''    |
| 5  | 0.131  | 0.149 | 0.502  | 10    | 0''    |
| 6  | 0.224  | 0.410 | 0.141  | 12    | 0''    |
| 7  | 0.224  | 0.590 | 0.641  | 11    | 0''    |
| 8  | 0.276  | 0.910 | 0.359  | 11    | 0''    |
| 9  | 0.276  | 0.090 | 0.859  | 11    | 0''    |
| 10 | 0.369  | 0.648 | -0.002 | 10    | 0''    |
| 11 | 0.369  | 0.352 | 0.498  | 10    | 0''    |
| 12 | 0.393  | 0.587 | 0.030  | 14    | 0''    |
| 13 | 0.393  | 0.413 | 0.530  | 15    | -1''   |
| 14 | 0.607  | 0.588 | 0.470  | 15    | -1''   |
| 15 | 0.607  | 0.412 | 0.970  | 15    | -1''   |
| 16 | 0.631  | 0.351 | 0.002  | 9     | 0''    |
| 17 | 0.631  | 0.649 | 0.502  | 10    | 0''    |
| 18 | 0.724  | 0.910 | 0.141  | 12    | 0''    |
| 19 | 0.724  | 0.090 | 0.641  | 11    | 0''    |
| 20 | 0.776  | 0.410 | 0.359  | 11    | 0''    |
| 21 | 0.776  | 0.590 | 0.859  | 11    | 0''    |
| 22 | 0.869  | 0.148 | -0.002 | 10    | 0''    |
| 23 | 0.869  | 0.852 | 0.498  | 10    | 0''    |

|                          |        |        |       |         |           |
|--------------------------|--------|--------|-------|---------|-----------|
| 24                       | 0.893  | 0.087  | 0.030 | 14      | 0 ''      |
| 25                       | 0.893  | 0.913  | 0.530 | 15      | -1 ''     |
| <b>{Co<sub>40</sub>}</b> |        |        |       |         |           |
| 1                        | -0.304 | -0.775 | 0.728 | 10964.0 | 2561.2 '' |
| 2                        | 0.082  | 0.964  | 0.535 | 14.8    | 0.0 ''    |
| 3                        | 0.395  | 0.329  | 0.151 | 12.5    | 3.4 ''    |
| 4                        | 0.605  | 0.671  | 0.849 | 12.5    | 3.6 ''    |
| 5                        | 0.918  | 0.036  | 0.465 | 14.8    | 0.0 ''    |

According to the SQUEEZE analysis and TGA measurements, the formula for the compounds are estimated as follows:

**Based on molecular electrons:**

**Notes:** The counter ions in Co30-A/B are highly disordered, and the cation is assumed to be  $[(\text{CH}_3)_2\text{NH}_2]^+$  which is a common counter ion in solvothermal reactions with DMF as a solvent.

**Electron numbers for the molecules:**  $(\text{CH}_3)_2\text{NH}_2 = 27 e^-$ ,  $\text{DMF} = 48 e^-$ ,  $\text{MeOH} = 26 e^-$ ,  $\text{NMP} = 62 e^-$

**Co30-A:**  $[\text{Co}_{30}(\text{TC4A})_6(\text{pdc})_{12}(\mu_2\text{-OMe})_6(\text{MeOH})_8(\text{H}_2\text{O})_6] \cdot [(\text{CH}_3)_2\text{NH}_2]_6(\text{DMF})_x(\text{MeOH})_y$

$x=58, y=0$  or  $x=0, y=108$ . **(1)**

**Co30-B:**  $[\text{Co}_{30}(\text{TC4A})_6(\text{pdc})_{12}(\mu_2\text{-OMe})_6(\text{H}_2\text{O})_{12}] \cdot [(\text{CH}_3)_2\text{NH}_2]_6(\text{DMF})_x(\text{MeOH})_y$

$x=27, y=0$  or  $x=0, y=50$ . **(2)**

**Co32-A:**  $[\text{Co}_{32}\text{Cl}_8(\text{TC4A})_8(\text{pdc})_8(\text{H}_2\text{O})_{16}](\text{NMP})_{8+x}(\text{MeOH})_y$

$x=34, y=0$  or  $x=0, y=82$ . **(3)**

**Co32-B:**  $[\text{Co}_{32}\text{Cl}_8(\text{TC4A})_8(\text{pdc})_8(\text{H}_2\text{O})_{16}] (\text{DMF})_{4.5+x}$

$x=31$ . **(4)**

**Co32-C:**  $[\text{Co}_{32}\text{Cl}_8(\text{TC4A})_8(\text{pdc})_8(\text{H}_2\text{O})_{13.4}(\text{DMF})_{0.8}(\text{dma})_{0.5}(\text{HCOOH})_{1.3}] (\text{DMF})_{14+x}$

$x=42$ . **(5)**

**Co40:**  $[\text{Co}_{40}\text{Cl}_{10}(\text{TC4A})_{10}(\text{pdc})_{10}(\text{H}_2\text{O})_{20}] (\text{DMF})_{24+x}$

$x=53$ . **(6)**

**Based on TGA results:**

**Co30-A:**  $[\text{Co}_{30}(\text{TC4A})_6(\text{pdc})_{12}(\mu_2\text{-OMe})_6(\text{MeOH})_8(\text{H}_2\text{O})_6] \cdot [(\text{CH}_3)_2\text{NH}_2]_6(\text{DMF})_x(\text{MeOH})_y$

$x=32, y=0$  or  $x=0, y=73$  (21.1% weight loss assigned to solvents). **(7)**

**Co30-B:**  $[\text{Co}_{30}(\text{TC4A})_6(\text{pdc})_{12}(\mu_2\text{-OMe})_6(\text{H}_2\text{O})_{12}] \cdot [(\text{CH}_3)_2\text{NH}_2]_6(\text{DMF})_x(\text{MeOH})_y$

$x=8, y=0$  or  $x=0, y=17$  (6% weight loss assigned to solvents). **(8)**

**Co32-A:**  $[\text{Co}_{32}\text{Cl}_8(\text{TC4A})_8(\text{pdc})_8(\text{H}_2\text{O})_{16}](\text{NMP})_{8+x}(\text{MeOH})_y$

$x=16, y=0$  or  $x=0, y=36$  (21.7% weight loss assigned to solvents) **(9)**

**Co32-B:**  $[\text{Co}_{32}\text{Cl}_8(\text{TC4A})_8(\text{pdc})_8(\text{H}_2\text{O})_{16}] (\text{DMF})_{4.5+x}$

$x=35$  (23.1% weight loss assigned to solvents). **(10)**

Take both SQUEEZE results and TGA tests in to consideration, the possible formula for the compounds are (7) for  $\{\text{Co}_{30}\text{-A}\}$ , (8) for  $\{\text{Co}_{30}\text{-B}\}$ , (9) for  $\{\text{Co}_{32}\text{-A}\}$ , (10) for  $\{\text{Co}_{32}\text{-B}\}$ , (5) for  $\{\text{Co}_{32}\text{-C}\}$ , (6) for  $\{\text{Co}_{40}\}$ .

**Table 7** Crystallographic data of the compounds

|                                                                | {Co <sub>30</sub> -A}                                                                     | {Co <sub>30</sub> -B}                                                                     | {Co <sub>32</sub> -A}                                                                                                 | {Co <sub>32</sub> -B}                                                                                                    | {Co <sub>32</sub> -C}                                                                                                            | {Co <sub>40</sub> }                                                                                         |
|----------------------------------------------------------------|-------------------------------------------------------------------------------------------|-------------------------------------------------------------------------------------------|-----------------------------------------------------------------------------------------------------------------------|--------------------------------------------------------------------------------------------------------------------------|----------------------------------------------------------------------------------------------------------------------------------|-------------------------------------------------------------------------------------------------------------|
| CCDC number                                                    | 2062188                                                                                   | 2062189                                                                                   | 2062190                                                                                                               | 2062191                                                                                                                  | 2062192                                                                                                                          | 2062193                                                                                                     |
| Crystal Formula*                                               | C <sub>325</sub> H <sub>374</sub> Co <sub>30</sub> N <sub>30</sub> O<br>92S <sub>24</sub> | C <sub>318</sub> H <sub>366</sub> Co <sub>30</sub> N <sub>30</sub> O<br>90S <sub>24</sub> | C <sub>400</sub> H <sub>464</sub> Cl <sub>8</sub> Co <sub>32</sub> N <sub>2</sub><br>4O <sub>88</sub> S <sub>32</sub> | C <sub>935</sub> H <sub>1283</sub> Cl <sub>16</sub> Co <sub>64</sub><br>N <sub>87</sub> O <sub>167</sub> S <sub>64</sub> | C <sub>430.73</sub> H <sub>548.5</sub> Cl <sub>8</sub> Co <sub>3</sub><br>2N <sub>39.3</sub> O <sub>108.83</sub> S <sub>32</sub> | C <sub>521</sub> H <sub>652</sub> Cl <sub>10</sub> Co <sub>40</sub> N<br>44O <sub>124</sub> S <sub>40</sub> |
| Formula weight                                                 | 8710.13                                                                                   | 8586.00                                                                                   | 10211.2                                                                                                               | 22804.76                                                                                                                 | 11213.15                                                                                                                         | 13508.89                                                                                                    |
| crystal system                                                 | triclinic                                                                                 | cubic                                                                                     | monoclinic                                                                                                            | orthorhombic                                                                                                             | monoclinic                                                                                                                       | triclinic                                                                                                   |
| space group                                                    | Cc                                                                                        | Pa-3                                                                                      | C2/c                                                                                                                  | Pca21                                                                                                                    | C2/c                                                                                                                             | P-1                                                                                                         |
| <i>a</i> [Å]                                                   | 54.4788(9)                                                                                | 37.3887(2)                                                                                | 66.638(2)                                                                                                             | 65.4426(5)                                                                                                               | 49.3116(10)                                                                                                                      | 23.7232(3)                                                                                                  |
| <i>b</i> [Å]                                                   | 30.7508(3)                                                                                | 37.3887(2)                                                                                | 51.3655(4)                                                                                                            | 35.1245(3)                                                                                                               | 26.6728(4)                                                                                                                       | 31.4851(4)                                                                                                  |
| <i>c</i> [Å]                                                   | 38.3160(8)                                                                                | 37.3887(2)                                                                                | 36.3667(12)                                                                                                           | 59.0133(5)                                                                                                               | 56.2706(10)                                                                                                                      | 36.7204(5)                                                                                                  |
| $\alpha$ [°]                                                   | 90                                                                                        | 90                                                                                        | 90                                                                                                                    | 90                                                                                                                       | 90                                                                                                                               | 69.6330(10)                                                                                                 |
| $\beta$ [°]                                                    | 110.400(2)                                                                                | 90                                                                                        | 143.163(7)                                                                                                            | 90                                                                                                                       | 97.979(2)                                                                                                                        | 71.5790(10)                                                                                                 |
| $\gamma$ [°]                                                   | 90                                                                                        | 90                                                                                        | 90                                                                                                                    | 90                                                                                                                       | 90                                                                                                                               | 84.6960(10)                                                                                                 |
| V [Å <sup>3</sup> ]                                            | 60163.7(19)                                                                               | 52266.2(8)                                                                                | 74630(8)                                                                                                              | 135650.2(19)                                                                                                             | 73295(2)                                                                                                                         | 24390.5(6)                                                                                                  |
| Z                                                              | 4                                                                                         | 4                                                                                         | 4                                                                                                                     | 4                                                                                                                        | 4                                                                                                                                | 1                                                                                                           |
| T[K]                                                           | 120                                                                                       | 110                                                                                       | 100                                                                                                                   | 100                                                                                                                      | 120                                                                                                                              | 120                                                                                                         |
| <i>D<sub>c</sub></i> [g/cm <sup>3</sup> ]*                     | 0.961                                                                                     | 1.091                                                                                     | 0.909                                                                                                                 | 1.117                                                                                                                    | 1.233                                                                                                                            | 1.184                                                                                                       |
| $\mu$ [mm <sup>-1</sup> ]                                      | 5.183                                                                                     | 5.970                                                                                     | 6.865                                                                                                                 | 0.934                                                                                                                    | 4.865                                                                                                                            | 4.579                                                                                                       |
| reflns coll.                                                   | 103131                                                                                    | 82632                                                                                     | 73304                                                                                                                 | 665146                                                                                                                   | 81978                                                                                                                            | 109466                                                                                                      |
| unique reflns                                                  | 60114                                                                                     | 19762                                                                                     | 39366                                                                                                                 | 259511                                                                                                                   | 81463                                                                                                                            | 87328                                                                                                       |
| <i>GOF</i>                                                     | 0.999                                                                                     | 1.505                                                                                     | 1.006                                                                                                                 | 0.955                                                                                                                    | 1.150                                                                                                                            | 1.046                                                                                                       |
| <i>R</i> 1[ <i>I</i> >2 $\sigma$ ( <i>I</i> )] <sup>[a]</sup>  | 7.40%                                                                                     | 15.71%                                                                                    | 7.79%                                                                                                                 | 10.37%                                                                                                                   | 10.00%                                                                                                                           | 8.28%                                                                                                       |
| <i>wR</i> 2[ <i>I</i> >2 $\sigma$ ( <i>I</i> )] <sup>[b]</sup> | 22.42%                                                                                    | 44.10%                                                                                    | 26.34%                                                                                                                | 27.68%                                                                                                                   | 32.56%                                                                                                                           | 28.78%                                                                                                      |

<sup>a</sup>  $RI = \sum ||F_o| - |F_c|| / \sum |F_o|$ . <sup>b</sup>  $wR2 = \{\sum [w(F_o^2 - F_c^2)^2] / \sum [w(F_o^2)^2]\}^{1/2}$ ; \*The formula and *D<sub>c</sub>* do not include the unidentified disordered solvents in

{Co<sub>30</sub>-A/B} and {Co<sub>32</sub>-A}.

**Table S8** Selected bond lengths for {Co<sub>30</sub>-A}.

| Atom | Atom | Length (Å) | Atom | Atom | Length (Å) |
|------|------|------------|------|------|------------|
| Co1  | S5   | 2.4338     | Co15 | N14  | 2.1013     |
| Co1  | O1   | 2.0649     | Co16 | S15  | 2.4636     |
| Co1  | O3   | 2.0524     | Co16 | O14  | 2.086      |
| Co1  | O4   | 2.0812     | Co16 | O19  | 2.3759     |
| Co1  | O8   | 2.0067     | Co16 | O35  | 1.9842     |
| Co1  | O17  | 2.2469     | Co16 | N10  | 2.0494     |
| Co2  | S1   | 2.4755     | Co16 | O66  | 2.0728     |
| Co2  | O2   | 2.0981     | Co17 | S11  | 2.4487     |
| Co2  | O3   | 2.1008     | Co17 | O30  | 2.1047     |
| Co2  | O12  | 2.0061     | Co17 | O43  | 2.3277     |
| Co2  | N1   | 2.0896     | Co17 | O53  | 2.1403     |
| Co2  | O34  | 2.2267     | Co17 | O56  | 1.9776     |
| Co3  | O1   | 2.0693     | Co17 | O60  | 2.0025     |
| Co3  | O15  | 1.9749     | Co18 | S12  | 2.4372     |
| Co3  | O17  | 2.2073     | Co18 | O25  | 2.0082     |
| Co3  | N3   | 2.0131     | Co18 | O44  | 2.1163     |
| Co3  | N5   | 2.0558     | Co18 | N16  | 2.116      |
| Co4  | S8   | 2.4357     | Co18 | O75  | 2.0542     |
| Co4  | O10  | 2.2971     | Co19 | S14  | 2.4573     |
| Co4  | O20  | 1.9643     | Co19 | O29  | 1.9928     |
| Co4  | O28  | 2.0986     | Co19 | O44  | 2.1099     |
| Co4  | O32  | 2.0252     | Co19 | O48  | 1.9348     |
| Co4  | O41  | 2.1222     | Co19 | O57  | 2.3982     |
| Co5  | S3   | 2.4466     | Co19 | O61  | 2.1205     |
| Co5  | O7   | 2.0781     | Co20 | S17  | 2.4918     |
| Co5  | O8   | 1.9905     | Co20 | O13  | 2.1394     |
| Co5  | O15  | 1.9547     | Co20 | O38  | 1.9601     |
| Co5  | O17  | 2.3378     | Co20 | O49  | 2.2969     |
| Co5  | O31  | 2.1271     | Co20 | O51  | 2.0304     |
| Co6  | S2   | 2.4318     | Co20 | N23  | 2.1334     |
| Co6  | O5   | 2.0249     | Co21 | O43  | 2.2003     |
| Co6  | O6   | 2.0179     | Co21 | O56  | 1.9684     |
| Co6  | O9   | 1.9542     | Co21 | N9   | 2.0009     |
| Co6  | O39  | 2.1065     | Co21 | O59  | 2.0588     |
| Co6  | O46  | 2.2489     | Co21 | O85  | 2.3944     |
| Co7  | O10  | 2.2001     | Co21 | N24  | 2.0234     |
| Co7  | O20  | 1.9486     | Co22 | O18  | 2.0456     |
| Co7  | N2   | 2.0469     | Co22 | O48  | 1.9385     |
| Co7  | O27  | 2.0681     | Co22 | N6   | 2.0835     |
| Co7  | O45  | 2.3706     | Co22 | O57  | 2.2122     |
| Co7  | N12  | 2.0549     | Co22 | N11  | 2.0298     |

|      |     |        |      |     |        |
|------|-----|--------|------|-----|--------|
| Co8  | S9  | 2.4279 | Co23 | S19 | 2.448  |
| Co8  | O10 | 2.2125 | Co23 | O18 | 2.0674 |
| Co8  | O23 | 2.0692 | Co23 | O29 | 1.9909 |
| Co8  | O27 | 2.077  | Co23 | O40 | 2.0147 |
| Co8  | O32 | 1.9715 | Co23 | O57 | 2.1742 |
| Co8  | O37 | 2.052  | Co23 | O63 | 2.0977 |
| Co9  | S4  | 2.4384 | Co24 | S24 | 2.436  |
| Co9  | O9  | 2.0256 | Co24 | O54 | 2.0773 |
| Co9  | O11 | 1.9534 | Co24 | O55 | 1.9345 |
| Co9  | O14 | 2.1311 | Co24 | O64 | 1.9833 |
| Co9  | O21 | 2.0742 | Co24 | O67 | 2.1122 |
| Co9  | O46 | 2.3366 | Co24 | O71 | 2.2663 |
| Co10 | S7  | 2.4582 | Co25 | S13 | 2.4645 |
| Co10 | O7  | 2.134  | Co25 | O13 | 2.0393 |
| Co10 | O12 | 1.9591 | Co25 | O43 | 2.2944 |
| Co10 | O24 | 2.0249 | Co25 | O59 | 2.0729 |
| Co10 | O34 | 2.4074 | Co25 | O60 | 1.9903 |
| Co10 | N8  | 1.9933 | Co25 | O72 | 2.0461 |
| Co11 | O6  | 2.0545 | Co26 | S21 | 2.4358 |
| Co11 | O11 | 1.9668 | Co26 | O36 | 1.9963 |
| Co11 | O46 | 2.1866 | Co26 | O52 | 2.0769 |
| Co11 | N7  | 2.051  | Co26 | O58 | 2.0961 |
| Co11 | N15 | 2.0367 | Co26 | O64 | 1.991  |
| Co12 | S10 | 2.4282 | Co26 | O71 | 2.2493 |
| Co12 | O22 | 2.0086 | Co27 | S18 | 2.4307 |
| Co12 | O28 | 2.1113 | Co27 | O16 | 1.9645 |
| Co12 | O33 | 2.3977 | Co27 | O54 | 2.0535 |
| Co12 | N4  | 2.0658 | Co27 | O88 | 1.9684 |
| Co12 | O68 | 2.0566 | Co27 | N25 | 2.058  |
| Co13 | S6  | 2.4472 | Co28 | S23 | 2.4758 |
| Co13 | O38 | 1.9806 | Co28 | O25 | 1.9916 |
| Co13 | O42 | 2.0868 | Co28 | O40 | 2.1307 |
| Co13 | O49 | 2.3306 | Co28 | O74 | 2.2038 |
| Co13 | O53 | 2.0756 | Co28 | N20 | 2.1841 |
| Co13 | N17 | 2.0816 | Co28 | O82 | 2.0978 |
| Co14 | S20 | 2.4597 | Co29 | O52 | 2.0342 |
| Co14 | O5  | 2.0681 | Co29 | O55 | 1.9177 |
| Co14 | O19 | 2.2097 | Co29 | O71 | 2.2277 |
| Co14 | O35 | 1.9797 | Co29 | N18 | 2.0802 |
| Co14 | O62 | 2.1247 | Co29 | N22 | 1.985  |
| Co14 | N13 | 2.0673 | Co30 | S22 | 2.4784 |
| Co15 | S16 | 2.4677 | Co30 | O16 | 2.0123 |
| Co15 | O22 | 1.9845 | Co30 | O36 | 2.0457 |

|      |     |        |      |     |        |
|------|-----|--------|------|-----|--------|
| Co15 | O23 | 2.0795 | Co30 | N19 | 2.14   |
| Co15 | O33 | 2.2064 | Co30 | O79 | 2.0292 |
| Co15 | O50 | 2.0801 | Co30 | O81 | 2.3274 |

**Table S9** Selected bond lengths for {Co<sub>30</sub>-B}.

| Atom | Atom            | Length/Å  | Atom | Atom             | Length/Å  |
|------|-----------------|-----------|------|------------------|-----------|
| Co1  | O1              | 1.953(9)  | Co3  | O2               | 2.350(9)  |
| Co1  | N3              | 1.987(6)  | Co3  | S2               | 2.414(4)  |
| Co1  | N2              | 2.007(9)  | Co4  | O11              | 2.034(9)  |
| Co1  | O3              | 2.056(8)  | Co4  | O7               | 2.041(11) |
| Co1  | O2              | 2.219(7)  | Co4  | O3               | 2.043(8)  |
| Co2  | O5              | 1.980(10) | Co4  | O2               | 2.150(8)  |
| Co2  | N1 <sup>1</sup> | 2.007(9)  | Co4  | O13              | 2.203(11) |
| Co2  | O4              | 2.045(8)  | Co4  | S3               | 2.437(5)  |
| Co2  | O9 <sup>1</sup> | 2.105(8)  | Co5  | O5               | 1.954(11) |
| Co2  | O6              | 2.407(9)  | Co5  | O11              | 2.027(10) |
| Co2  | S1              | 2.442(3)  | Co5  | N4 <sup>1</sup>  | 2.042(8)  |
| Co3  | O7              | 1.954(10) | Co5  | O6               | 2.093(9)  |
| Co3  | O1              | 2.000(7)  | Co5  | O15 <sup>1</sup> | 2.112(10) |
| Co3  | O8              | 2.076(9)  | Co5  | S4               | 2.431(6)  |
| Co3  | O4              | 2.084(8)  |      |                  |           |

Symmetry code for 1:  $3/2 - x, 1/2 + y, z$

**Table S10** Selected bond lengths for {Co<sub>32</sub>-A}.

| Atom | Atom            | Length/Å   | Atom | Atom            | Length/Å   |
|------|-----------------|------------|------|-----------------|------------|
| Co1  | O6              | 2.007(4)   | Co9  | S11             | 2.5293(18) |
| Co1  | O10             | 2.065(4)   | Co9  | O9              | 1.993(4)   |
| Co1  | O20             | 1.989(4)   | Co9  | O13             | 2.009(4)   |
| Co1  | N2 <sup>1</sup> | 2.084(4)   | Co9  | O15             | 2.023(4)   |
| Co2  | Cl1             | 2.7140(15) | Co9  | O33             | 2.101(4)   |
| Co2  | S6              | 2.5424(16) | Co10 | Cl4             | 2.7174(18) |
| Co2  | O1              | 2.017(3)   | Co10 | S8              | 2.5184(18) |
| Co2  | O13             | 2.067(4)   | Co10 | O4              | 2.009(4)   |
| Co2  | O30             | 1.989(4)   | Co10 | O26             | 1.994(4)   |
| Co2  | N3 <sup>1</sup> | 2.090(5)   | Co10 | O29             | 2.063(4)   |
| Co3  | Cl1             | 2.7270(15) | Co10 | N7 <sup>1</sup> | 2.087(5)   |
| Co3  | S2              | 2.5326(16) | Co11 | Cl2             | 2.5914(16) |
| Co3  | O1              | 2.018(3)   | Co11 | S14             | 2.5316(18) |
| Co3  | O8              | 1.982(3)   | Co11 | O10             | 2.020(4)   |
| Co3  | O11             | 2.065(4)   | Co11 | O27             | 2.036(4)   |
| Co3  | N6 <sup>1</sup> | 2.098(5)   | Co11 | O32             | 2.017(4)   |
| Co4  | Cl3             | 2.7337(16) | Co11 | O36             | 2.091(5)   |
| Co4  | S7              | 2.5356(16) | Co12 | Cl3             | 2.6002(17) |



|     |                 |            |      |     |            |
|-----|-----------------|------------|------|-----|------------|
| Co4 | O3              | 2.011(3)   | Co12 | S10 | 2.5127(19) |
| Co4 | O12             | 2.081(4)   | Co12 | O12 | 2.026(4)   |
| Co4 | O18             | 1.976(4)   | Co12 | O17 | 2.013(4)   |
| Co4 | N5 <sup>1</sup> | 2.103(5)   | Co12 | O22 | 2.002(4)   |
| Co5 | Cl3             | 2.7134(17) | Co12 | O35 | 2.090(5)   |
| Co5 | S5              | 2.5207(16) | Co13 | Cl4 | 2.5881(17) |
| Co5 | O3              | 2.020(4)   | Co13 | S13 | 2.5360(18) |
| Co5 | O14             | 2.071(4)   | Co13 | O5  | 2.017(4)   |
| Co5 | O19             | 1.998(4)   | Co13 | O21 | 2.028(4)   |
| Co5 | N4 <sup>1</sup> | 2.098(5)   | Co13 | O31 | 2.012(4)   |
| Co6 | Cl1             | 2.6148(17) | Co13 | O38 | 2.039(5)   |
| Co6 | S9              | 2.5171(18) | Co14 | Cl2 | 2.6077(16) |
| Co6 | O2              | 1.999(4)   | Co14 | S15 | 2.5344(19) |
| Co6 | O9              | 2.004(4)   | Co14 | O7  | 2.016(4)   |
| Co6 | O11             | 2.011(4)   | Co14 | O24 | 2.024(4)   |
| Co6 | O34             | 2.099(4)   | Co14 | O32 | 2.002(4)   |
| Co7 | Cl2             | 2.7071(17) | Co14 | O39 | 2.085(5)   |
| Co7 | S1              | 2.5235(17) | Co15 | Cl3 | 2.5991(16) |
| Co7 | O6              | 2.024(3)   | Co15 | S12 | 2.5337(18) |
| Co7 | O7              | 2.076(4)   | Co15 | O14 | 2.016(4)   |
| Co7 | O23             | 1.998(4)   | Co15 | O16 | 2.023(4)   |
| Co7 | N1 <sup>1</sup> | 2.097(4)   | Co15 | O22 | 2.009(4)   |
| Co8 | S4              | 2.5227(17) | Co15 | O37 | 2.094(5)   |
| Co8 | Cl4             | 2.7189(18) | Co16 | Cl4 | 2.6179(19) |
| Co8 | O4              | 2.009(4)   | Co16 | S16 | 2.541(2)   |
| Co8 | O21             | 2.076(4)   | Co16 | O25 | 2.041(4)   |
| Co8 | O28             | 1.979(4)   | Co16 | O29 | 1.999(5)   |
| Co8 | N8 <sup>1</sup> | 2.085(5)   | Co16 | O31 | 2.020(4)   |
| Co9 | Cl1             | 2.5991(16) | Co16 | O40 | 2.080(6)   |

Symmetry code for 1:  $1 - x, y, 1/2 - z$

**Table S11** Selected bond lengths for {Co<sub>32</sub>-B}.

| Atom | Atom | Length/Å  | Atom | Atom | Length/Å  |
|------|------|-----------|------|------|-----------|
| Co1  | S5   | 2.499(4)  | Co33 | O7   | 2.011(10) |
| Co1  | O6   | 2.001(10) | Co33 | O9   | 2.047(10) |
| Co1  | O17  | 2.066(9)  | Co33 | O54  | 2.039(10) |
| Co1  | O67  | 2.012(9)  | Co33 | N10  | 2.084(12) |
| Co1  | N11  | 2.048(12) | Co34 | Cl11 | 2.740(5)  |
| Co2  | S2   | 2.546(4)  | Co34 | S34  | 2.528(5)  |
| Co2  | O29  | 2.003(10) | Co34 | O44  | 1.983(9)  |
| Co2  | O71  | 1.985(9)  | Co34 | O53  | 2.025(9)  |
| Co2  | N18  | 2.094(13) | Co34 | N12  | 2.106(12) |
| Co2  | O126 | 1.989(9)  | Co34 | O122 | 2.066(10) |
| Co3  | Cl4  | 2.713(4)  | Co35 | Cl5  | 2.737(4)  |

|      |      |           |      |      |           |
|------|------|-----------|------|------|-----------|
| Co3  | S7   | 2.507(4)  | Co35 | S42  | 2.542(4)  |
| Co3  | O4   | 2.002(10) | Co35 | O51  | 2.006(10) |
| Co3  | O86  | 2.045(10) | Co35 | O55  | 2.036(10) |
| Co3  | O126 | 1.997(10) | Co35 | N19  | 2.099(12) |
| Co3  | N26  | 2.059(12) | Co35 | O128 | 2.006(10) |
| Co4  | Cl1  | 2.584(4)  | Co36 | S14  | 2.499(4)  |
| Co4  | S52  | 2.541(5)  | Co36 | Cl8  | 2.730(4)  |
| Co4  | O16  | 1.998(10) | Co36 | O30  | 2.018(10) |
| Co4  | O61  | 2.013(10) | Co36 | O60  | 2.009(10) |
| Co4  | O69  | 2.044(10) | Co36 | O68  | 1.991(9)  |
| Co4  | O146 | 2.090(12) | Co36 | N20  | 2.105(12) |
| Co5  | S6   | 2.514(4)  | Co37 | S26  | 2.518(4)  |
| Co5  | Cl9  | 2.729(4)  | Co37 | Cl15 | 2.627(4)  |
| Co5  | O13  | 2.057(10) | Co37 | O9   | 1.994(10) |
| Co5  | O49  | 2.027(9)  | Co37 | O20  | 2.014(10) |
| Co5  | O114 | 2.041(10) | Co37 | O21  | 2.003(10) |
| Co5  | N29  | 2.106(12) | Co37 | O149 | 2.067(10) |
| Co6  | S55  | 2.499(4)  | Co38 | S30  | 2.523(4)  |
| Co6  | O34  | 1.955(9)  | Co38 | O56  | 1.953(11) |
| Co6  | N3   | 2.078(12) | Co38 | O98  | 1.998(10) |
| Co6  | O64  | 2.082(10) | Co38 | N24  | 2.133(12) |
| Co6  | O75  | 2.031(9)  | Co38 | O134 | 2.008(10) |
| Co7  | Cl2  | 2.625(4)  | Co39 | Cl5  | 2.713(5)  |
| Co7  | S10  | 2.553(4)  | Co39 | S48  | 2.526(4)  |
| Co7  | O6   | 1.996(10) | Co39 | N7   | 2.081(12) |
| Co7  | O23  | 1.951(10) | Co39 | O85  | 2.062(10) |
| Co7  | O125 | 2.028(9)  | Co39 | O128 | 2.067(10) |
| Co7  | O156 | 2.025(11) | Co39 | O129 | 2.045(10) |
| Co8  | Cl3  | 2.720(4)  | Co40 | Cl13 | 2.705(4)  |
| Co8  | S1   | 2.536(4)  | Co40 | S62  | 2.520(4)  |
| Co8  | O15  | 1.986(9)  | Co40 | O32  | 1.967(9)  |
| Co8  | O33  | 2.047(9)  | Co40 | O42  | 2.040(10) |
| Co8  | N1   | 2.110(12) | Co40 | O57  | 2.081(11) |
| Co8  | O66  | 1.983(9)  | Co40 | N17  | 2.099(12) |
| Co9  | Cl12 | 2.699(4)  | Co41 | Cl11 | 2.619(4)  |
| Co9  | S49  | 2.520(4)  | Co41 | S41  | 2.516(5)  |
| Co9  | O25  | 1.974(9)  | Co41 | O78  | 2.034(9)  |
| Co9  | N5   | 2.087(12) | Co41 | O97  | 1.993(10) |
| Co9  | O102 | 2.053(10) | Co41 | O122 | 2.014(10) |
| Co9  | O145 | 1.999(9)  | Co41 | O132 | 2.086(11) |
| Co10 | Cl1  | 2.711(4)  | Co42 | Cl7  | 2.591(4)  |
| Co10 | S54  | 2.510(4)  | Co42 | S50  | 2.528(4)  |
| Co10 | O16  | 2.032(10) | Co42 | O12  | 2.024(11) |
| Co10 | O62  | 2.021(9)  | Co42 | O72  | 2.019(11) |
| Co10 | O75  | 1.997(8)  | Co42 | O96  | 2.149(11) |
| Co10 | N35  | 2.062(12) | Co42 | O134 | 2.027(10) |
| Co11 | Cl6  | 2.703(4)  | Co43 | Cl10 | 2.631(4)  |

|      |      |           |      |      |           |
|------|------|-----------|------|------|-----------|
| Co11 | S12  | 2.537(4)  | Co43 | S27  | 2.552(4)  |
| Co11 | O31  | 2.015(9)  | Co43 | O38  | 2.018(12) |
| Co11 | O46  | 2.007(10) | Co43 | O43  | 2.027(10) |
| Co11 | O131 | 2.018(9)  | Co43 | O58  | 2.083(10) |
| Co11 | N33  | 2.063(12) | Co43 | O150 | 2.052(12) |
| Co12 | Cl12 | 2.582(4)  | Co44 | S9   | 2.518(4)  |
| Co12 | S51  | 2.532(4)  | Co44 | Cl15 | 2.722(4)  |
| Co12 | O22  | 2.038(9)  | Co44 | O11  | 2.074(10) |
| Co12 | O102 | 2.024(10) | Co44 | O54  | 2.021(10) |
| Co12 | O143 | 1.989(9)  | Co44 | O65  | 1.967(9)  |
| Co12 | O157 | 2.080(12) | Co44 | N23  | 2.051(12) |
| Co13 | Cl3  | 2.610(4)  | Co45 | S44  | 2.525(4)  |
| Co13 | S38  | 2.543(4)  | Co45 | O81  | 1.978(10) |
| Co13 | O33  | 2.029(9)  | Co45 | O82  | 2.035(11) |
| Co13 | O63  | 2.033(9)  | Co45 | O87  | 2.055(10) |
| Co13 | O83  | 2.121(10) | Co45 | Cl16 | 2.629(4)  |
| Co13 | O93  | 1.988(10) | Co45 | O141 | 2.084(11) |
| Co14 | Cl3  | 2.583(4)  | Co46 | Cl10 | 2.570(4)  |
| Co14 | S46  | 2.498(5)  | Co46 | S45  | 2.526(5)  |
| Co14 | O2   | 2.014(10) | Co46 | O58  | 1.940(10) |
| Co14 | O36  | 2.023(9)  | Co46 | O70  | 2.001(10) |
| Co14 | O89  | 2.130(11) | Co46 | O109 | 2.095(11) |
| Co14 | O93  | 2.025(9)  | Co46 | O138 | 2.051(10) |
| Co15 | S4   | 2.527(4)  | Co47 | Cl5  | 2.607(4)  |
| Co15 | Cl9  | 2.598(4)  | Co47 | S53  | 2.530(5)  |
| Co15 | O40  | 2.073(10) | Co47 | O55  | 2.030(10) |
| Co15 | O94  | 2.055(10) | Co47 | O77  | 2.055(10) |
| Co15 | O114 | 1.978(10) | Co47 | O101 | 2.080(9)  |
| Co15 | O133 | 2.001(11) | Co47 | C252 | 1.995(14) |
| Co16 | Cl4  | 2.607(4)  | Co48 | S43  | 2.520(4)  |
| Co16 | S13  | 2.540(4)  | Co48 | O52  | 1.998(10) |
| Co16 | O10  | 2.017(10) | Co48 | O53  | 2.015(10) |
| Co16 | O24  | 2.019(11) | Co48 | O84  | 2.061(10) |
| Co16 | O86  | 2.010(10) | Co48 | N34  | 2.086(12) |
| Co16 | O92  | 2.098(10) | Co49 | Cl13 | 2.593(4)  |
| Co17 | S47  | 2.513(4)  | Co49 | S58  | 2.557(5)  |
| Co17 | O18  | 2.106(10) | Co49 | O57  | 2.027(11) |
| Co17 | O48  | 1.992(9)  | Co49 | O106 | 1.914(11) |
| Co17 | N27  | 2.058(12) | Co49 | O115 | 2.021(12) |
| Co17 | O145 | 2.027(9)  | Co49 | O140 | 2.027(10) |
| Co18 | S59  | 2.511(4)  | Co50 | S21  | 2.519(4)  |
| Co18 | O2   | 2.023(10) | Co50 | Cl8  | 2.731(4)  |
| Co18 | O15  | 2.001(8)  | Co50 | O60  | 2.006(10) |
| Co18 | N2   | 2.082(12) | Co50 | O95  | 2.040(10) |
| Co18 | O74  | 1.997(9)  | Co50 | N31  | 2.120(12) |
| Co19 | Cl4  | 2.588(4)  | Co50 | O139 | 2.016(10) |
| Co19 | S15  | 2.514(5)  | Co51 | S29  | 2.510(4)  |

|      |      |           |      |      |           |
|------|------|-----------|------|------|-----------|
| Co19 | O10  | 1.986(9)  | Co51 | N8   | 2.075(12) |
| Co19 | O29  | 2.037(10) | Co51 | O79  | 1.992(11) |
| Co19 | O80  | 2.053(10) | Co51 | O81  | 2.007(10) |
| Co19 | O105 | 2.036(9)  | Co51 | C116 | 2.725(4)  |
| Co20 | S18  | 2.521(4)  | Co51 | O123 | 2.022(10) |
| Co20 | O31  | 1.940(9)  | Co52 | S22  | 2.542(5)  |
| Co20 | N9   | 2.090(12) | Co52 | C18  | 2.595(4)  |
| Co20 | O124 | 1.982(10) | Co52 | O41  | 1.928(11) |
| Co20 | O142 | 2.030(11) | Co52 | O95  | 2.094(10) |
| Co21 | C12  | 2.617(4)  | Co52 | O100 | 1.971(11) |
| Co21 | S25  | 2.496(4)  | Co52 | O155 | 2.132(12) |
| Co21 | O5   | 2.041(10) | Co53 | S39  | 2.531(5)  |
| Co21 | O23  | 1.999(10) | Co53 | O82  | 2.007(10) |
| Co21 | O112 | 2.031(10) | Co53 | O90  | 2.026(10) |
| Co21 | O130 | 2.055(11) | Co53 | C116 | 2.607(4)  |
| Co22 | C16  | 2.603(4)  | Co53 | O144 | 2.144(12) |
| Co22 | S17  | 2.517(5)  | Co53 | O147 | 1.960(10) |
| Co22 | O26  | 1.985(10) | Co54 | C18  | 2.642(4)  |
| Co22 | O142 | 2.044(11) | Co54 | S24  | 2.503(5)  |
| Co22 | O151 | 2.131(13) | Co54 | O30  | 2.010(11) |
| Co22 | O152 | 2.061(11) | Co54 | O35  | 1.977(10) |
| Co23 | S3   | 2.538(4)  | Co54 | O41  | 1.988(10) |
| Co23 | O8   | 2.004(9)  | Co54 | O148 | 2.079(12) |
| Co23 | O47  | 2.022(9)  | Co55 | C111 | 2.613(4)  |
| Co23 | N14  | 2.199(13) | Co55 | S35  | 2.554(5)  |
| Co23 | C121 | 2.032(15) | Co55 | O84  | 1.964(10) |
| Co24 | C12  | 2.731(4)  | Co55 | O88  | 2.074(10) |
| Co24 | S31  | 2.518(4)  | Co55 | O97  | 1.993(10) |
| Co24 | O5   | 2.021(10) | Co55 | O113 | 2.147(13) |
| Co24 | O17  | 2.008(10) | Co56 | C15  | 2.633(4)  |
| Co24 | O39  | 1.980(9)  | Co56 | S37  | 2.536(5)  |
| Co24 | N6   | 2.096(12) | Co56 | O85  | 2.037(10) |
| Co25 | C19  | 2.734(4)  | Co56 | O91  | 2.073(11) |
| Co25 | S40  | 2.520(4)  | Co56 | C239 | 2.016(14) |
| Co25 | O1   | 2.100(10) | Co56 | C252 | 1.975(14) |
| Co25 | O13  | 1.996(10) | Co57 | C110 | 2.715(4)  |
| Co25 | O14  | 1.973(10) | Co57 | S33  | 2.524(4)  |
| Co25 | N30  | 2.092(13) | Co57 | O43  | 2.035(10) |
| Co26 | C11  | 2.631(4)  | Co57 | O50  | 2.012(10) |
| Co26 | S60  | 2.535(6)  | Co57 | O73  | 1.976(10) |
| Co26 | O59  | 2.044(10) | Co57 | N28  | 2.098(11) |
| Co26 | O61  | 2.026(10) | Co58 | S63  | 2.513(5)  |
| Co26 | O64  | 1.993(11) | Co58 | N4   | 2.134(13) |
| Co26 | O108 | 1.936(12) | Co58 | O104 | 1.994(10) |
| Co27 | S16  | 2.527(6)  | Co58 | C116 | 2.725(5)  |
| Co27 | C114 | 2.614(4)  | Co58 | O123 | 2.041(10) |
| Co27 | O27  | 2.044(10) | Co58 | O147 | 2.038(10) |

|      |      |           |      |      |           |
|------|------|-----------|------|------|-----------|
| Co27 | O76  | 1.967(10) | Co59 | S32  | 2.529(4)  |
| Co27 | O127 | 2.006(10) | Co59 | O45  | 1.997(9)  |
| Co27 | O158 | 2.149(9)  | Co59 | O50  | 2.038(9)  |
| Co28 | S19  | 2.518(5)  | Co59 | O70  | 2.053(10) |
| Co28 | Cl14 | 2.581(5)  | Co59 | N32  | 2.061(12) |
| Co28 | O3   | 2.055(9)  | Co60 | Cl7  | 2.724(4)  |
| Co28 | O76  | 2.009(10) | Co60 | O28  | 2.112(10) |
| Co28 | C121 | 2.044(15) | Co60 | O98  | 1.997(10) |
| Co28 | O159 | 2.098(9)  | Co60 | N25  | 2.078(12) |
| Co29 | Cl6  | 2.618(4)  | Co60 | S64  | 2.521(4)  |
| Co29 | S23  | 2.550(5)  | Co60 | O137 | 1.933(10) |
| Co29 | O26  | 1.995(11) | Co61 | S8   | 2.570(5)  |
| Co29 | O46  | 2.038(10) | Co61 | Cl7  | 2.590(4)  |
| Co29 | O107 | 2.067(11) | Co61 | O12  | 2.027(10) |
| Co29 | O136 | 2.015(9)  | Co61 | O28  | 1.983(10) |
| Co30 | Cl9  | 2.622(4)  | Co61 | O116 | 2.002(10) |
| Co30 | S57  | 2.516(5)  | Co61 | O118 | 2.017(12) |
| Co30 | O1   | 1.954(10) | Co62 | S20  | 2.523(4)  |
| Co30 | O19  | 2.008(11) | Co62 | Cl15 | 2.609(4)  |
| Co30 | O99  | 2.131(13) | Co62 | O11  | 2.020(10) |
| Co30 | O133 | 2.012(11) | Co62 | O20  | 1.996(10) |
| Co31 | Cl12 | 2.624(4)  | Co62 | O110 | 2.116(11) |
| Co31 | S56  | 2.525(5)  | Co62 | O117 | 2.075(10) |
| Co31 | O18  | 1.970(10) | Co63 | S36  | 2.516(5)  |
| Co31 | O37  | 2.024(9)  | Co63 | Cl13 | 2.620(4)  |
| Co31 | O121 | 2.138(11) | Co63 | O106 | 2.043(11) |
| Co31 | O143 | 2.041(9)  | Co63 | O111 | 2.002(11) |
| Co32 | S28  | 2.509(4)  | Co63 | O120 | 1.962(11) |
| Co32 | Cl14 | 2.715(4)  | Co63 | O153 | 2.083(13) |
| Co32 | O27  | 1.988(10) | Co64 | S61  | 2.530(4)  |
| Co32 | O47  | 2.012(10) | Co64 | O42  | 2.024(11) |
| Co32 | O119 | 2.011(11) | Co64 | N16  | 2.110(12) |
| Co32 | N36  | 2.085(13) | Co64 | O120 | 2.134(11) |
| Co33 | S11  | 2.515(4)  | Co64 | O135 | 2.003(11) |

**Table S12** Selected bond lengths for {Co<sub>32</sub>-C}.

| Atom | Atom | Length/Å   | Atom | Atom             | Length/Å   |
|------|------|------------|------|------------------|------------|
| Co1  | Cl1  | 2.7041(14) | Co9  | O2               | 2.029(3)   |
| Co1  | S9   | 2.5158(15) | Co9  | O12              | 2.058(4)   |
| Co1  | O1   | 2.016(3)   | Co9  | N5               | 2.083(4)   |
| Co1  | O5   | 1.996(3)   | Co9  | O39 <sup>l</sup> | 1.990(4)   |
| Co1  | O16  | 2.069(3)   | Co10 | Cl3              | 2.7178(15) |
| Co1  | N1   | 2.103(4)   | Co10 | S6               | 2.5147(16) |
| Co2  | S7   | 2.5078(15) | Co10 | O7               | 1.972(4)   |
| Co2  | Cl4  | 2.7332(15) | Co10 | O11              | 2.068(4)   |
| Co2  | O12  | 2.069(3)   | Co10 | O19              | 2.025(3)   |

|     |     |            |      |                  |            |
|-----|-----|------------|------|------------------|------------|
| Co2 | O18 | 2.031(3)   | Co10 | N7               | 2.113(5)   |
| Co2 | O21 | 2.019(4)   | Co11 | S3               | 2.5123(15) |
| Co2 | N3  | 2.080(4)   | Co11 | Cl3              | 2.7378(15) |
| Co3 | Cl2 | 2.7081(14) | Co11 | O13              | 2.076(3)   |
| Co3 | S8  | 2.5105(15) | Co11 | O19              | 2.014(4)   |
| Co3 | O3  | 2.032(3)   | Co11 | O29 <sup>1</sup> | 1.986(4)   |
| Co3 | O6  | 2.006(3)   | Co11 | N8               | 2.104(4)   |
| Co3 | O26 | 2.058(3)   | Co12 | Cl2              | 2.5889(14) |
| Co3 | N2  | 2.103(4)   | Co12 | S14              | 2.5245(15) |
| Co4 | S5  | 2.5335(15) | Co12 | O14              | 2.029(3)   |
| Co4 | O3  | 2.019(4)   | Co12 | O25              | 2.070(4)   |
| Co4 | O27 | 2.047(3)   | Co12 | O27              | 2.023(4)   |
| Co4 | O28 | 1.983(4)   | Co12 | O36              | 2.095(4)   |
| Co4 | N4  | 2.087(4)   | Co13 | Cl4              | 2.5883(15) |
| Co5 | S1  | 2.5416(15) | Co13 | S12              | 2.5503(16) |
| Co5 | O1  | 2.017(4)   | Co13 | O15              | 2.064(4)   |
| Co5 | O23 | 2.059(3)   | Co13 | O18              | 2.001(4)   |
| Co5 | O24 | 1.989(4)   | Co13 | O30              | 2.028(4)   |
| Co5 | N6  | 2.103(4)   | Co13 | O38              | 2.071(4)   |
| Co6 | Cl1 | 2.6189(14) | Co14 | Cl4              | 2.5994(15) |
| Co6 | S13 | 2.5247(15) | Co14 | S10              | 2.5577(15) |
| Co6 | O8  | 1.997(3)   | Co14 | O2               | 2.001(4)   |
| Co6 | O9  | 2.006(4)   | Co14 | O30              | 2.038(4)   |
| Co6 | O16 | 2.016(3)   | Co14 | O32 <sup>1</sup> | 2.071(4)   |
| Co6 | O33 | 2.109(4)   | Co14 | O40              | 2.091(4)   |
| Co7 | Cl2 | 2.6477(14) | Co15 | Cl3              | 2.5885(14) |
| Co7 | S16 | 2.5678(15) | Co15 | S11              | 2.5321(15) |
| Co7 | O4  | 2.072(3)   | Co15 | O10 <sup>1</sup> | 2.015(4)   |
| Co7 | O14 | 2.032(3)   | Co15 | O13              | 2.025(4)   |
| Co7 | O26 | 2.007(4)   | Co15 | O22              | 2.009(4)   |
| Co7 | O35 | 2.070(5)   | Co15 | O34              | 2.119(5)   |
| Co8 | Cl1 | 2.6115(14) | Co15 | N15              | 2.119(5)   |
| Co8 | S2  | 2.5182(15) | Co16 | Cl3              | 2.6569(15) |
| Co8 | O8  | 1.991(4)   | Co16 | S15              | 2.5443(17) |
| Co8 | O17 | 2.021(4)   | Co16 | O11              | 1.996(4)   |
| Co8 | O23 | 2.013(4)   | Co16 | O20              | 2.033(4)   |
| Co8 | O37 | 2.114(4)   | Co16 | O22              | 2.017(4)   |
| Co9 | S4  | 2.5231(15) | Co16 | O31              | 2.087(4)   |

Symmetry code for 1:  $1 - x, y, 1/2 - z$

**Table S13** Selected bond lengths for {Co<sub>40</sub>}.

| Atom | Atom            | Length/Å | Atom | Atom             | Length/Å |
|------|-----------------|----------|------|------------------|----------|
| Co1  | S3              | 2.54     | Co11 | O11              | 1.9961   |
| Co1  | O2              | 2.0107   | Co11 | O22              | 1.9985   |
| Co1  | O4              | 2.058    | Co11 | O40              | 2.0921   |
| Co1  | O12             | 1.9984   | Co12 | Cl2              | 2.5761   |
| Co1  | N7 <sup>1</sup> | 2.1096   | Co12 | S12              | 2.5118   |
| Co2  | S1              | 2.5182   | Co12 | O5               | 2.0207   |
| Co2  | Cl2             | 2.7236   | Co12 | O11              | 2.0288   |
| Co2  | O1              | 2.0049   | Co12 | O23              | 2.0447   |
| Co2  | O8              | 2.0942   | Co12 | O42              | 2.0718   |
| Co2  | O10             | 1.9866   | Co13 | S16              | 2.525    |
| Co2  | N3 <sup>1</sup> | 2.1072   | Co13 | O25              | 2.0027   |
| Co3  | S4              | 2.554    | Co13 | O32              | 2.0545   |
| Co3  | O1              | 1.9997   | Co13 | O39              | 1.9812   |
| Co3  | O5              | 2.0797   | Co13 | N10 <sup>1</sup> | 2.0853   |
| Co3  | O14             | 1.994    | Co14 | S15              | 2.5476   |
| Co3  | N4 <sup>1</sup> | 2.1185   | Co14 | O20              | 2.003    |
| Co4  | Cl1             | 2.5912   | Co14 | O25              | 1.9919   |
| Co4  | S5              | 2.5145   | Co14 | N8 <sup>1</sup>  | 2.1029   |
| Co4  | O4              | 2.0125   | Co14 | O58              | 2.0523   |
| Co4  | O6              | 2.0551   | Co15 | Cl3              | 2.6035   |
| Co4  | O19             | 1.9965   | Co15 | S13              | 2.5388   |
| Co4  | O31             | 2.0766   | Co15 | O9               | 1.9973   |
| Co5  | S6              | 2.5276   | Co15 | O21              | 1.9963   |
| Co5  | O2              | 2.0084   | Co15 | O30              | 2.0497   |
| Co5  | O7              | 2.0728   | Co15 | O45              | 2.0653   |
| Co5  | O15             | 1.9913   | Co16 | Cl3              | 2.6158   |
| Co5  | N9 <sup>1</sup> | 2.1038   | Co16 | S14              | 2.533    |
| Co6  | S7              | 2.5269   | Co16 | O13              | 2.0198   |
| Co6  | O16             | 2.0319   | Co16 | O21              | 2.0515   |
| Co6  | O26             | 2.0404   | Co16 | O37              | 2.0474   |
| Co6  | O33             | 1.9653   | Co16 | O48              | 2.0872   |
| Co6  | N1 <sup>1</sup> | 2.0792   | Co17 | Cl4              | 2.5989   |
| Co7  | S2              | 2.5163   | Co17 | S18              | 2.5177   |
| Co7  | O3              | 2.0231   | Co17 | O17              | 2.0234   |
| Co7  | O9              | 2.0716   | Co17 | O24              | 2.0494   |
| Co7  | O29             | 1.9765   | Co17 | O34              | 2.0042   |
| Co7  | N5 <sup>1</sup> | 2.0904   | Co17 | O44              | 2.091    |
| Co8  | S8              | 2.5278   | Co18 | Cl4              | 2.6027   |

|      |                 |        |      |     |        |
|------|-----------------|--------|------|-----|--------|
| Co8  | O16             | 2.0087 | Co18 | S17 | 2.5039 |
| Co8  | O17             | 2.0738 | Co18 | O26 | 2.0081 |
| Co8  | O27             | 1.9861 | Co18 | O28 | 2.071  |
| Co8  | N2 <sup>1</sup> | 2.0923 | Co18 | O34 | 2.0261 |
| Co9  | S11             | 2.5493 | Co18 | O47 | 2.1186 |
| Co9  | O3              | 2.0093 | Co19 | Cl5 | 2.594  |
| Co9  | O13             | 2.0673 | Co19 | S19 | 2.5063 |
| Co9  | O35             | 1.9747 | Co19 | O36 | 2.0239 |
| Co9  | N6 <sup>1</sup> | 2.0989 | Co19 | O41 | 2.0158 |
| Co10 | Cl1             | 2.6004 | Co19 | O46 | 2.1177 |
| Co10 | S10             | 2.5187 | Co19 | O58 | 2.0254 |
| Co10 | O7              | 2.0025 | Co20 | Cl5 | 2.6188 |
| Co10 | O18             | 2.0382 | Co20 | S20 | 2.5237 |
| Co10 | O19             | 2.0273 | Co20 | O32 | 2.0292 |
| Co10 | O43             | 2.0866 | Co20 | O38 | 2.0314 |
| Co11 | Cl2             | 2.626  | Co20 | O41 | 2.001  |
| Co11 | S9              | 2.5392 | Co20 | O49 | 2.1166 |
| Co11 | O8              | 2.0063 |      |     |        |

Symmetry code for 1:  $1 - x, 1 - y, 1 - z$

## References

- 1 N. Iki, C. Kabuto, T. Fukushima, H. Kumagai, H. Takeya, S. Miyanari, T. Miyashi and S. Miyano, *Tetrahedron* 2000, **56**, 1437–1443.
- 2 Rigaku Oxford Diffraction. *CrysAlis<sup>Pro</sup> Software system, version 1.171.40.25a*, Rigaku Corporation: Oxford, UK, 2018.
- 3 G. M. Sheldrick, *Acta Crystallogr., C: Struct. Chem.*, 2015, **A71**, 3–8.
- 4 O. V. Dolomanov, L. J. Bourhis, R. J. Gildea, J. A. K. Howard, H. Puschmann, *J. Appl. Crystallogr.*, 2009, **42**, 339–341.
- 5 A. L. Spek, *J. Appl. Crystallogr., Sect. D*. 2003, **36**, 7–13.
- 6 Y. Bi, X.-T. Wang, W. Liao, X. Wang, X. Wang, H. Zhang and S. Gao, *J. Am. Chem. Soc.*, 2009, **131**, 11650–11651.
- 7 D. Geng, X. Han, Y. Bi, Y. Qin, Q. Li, L. Huang, K. Zhou, L. Song and Z. Zheng, *Chem. Sci.*, 2018, **9**, 8535–8541.
